# Supplementary material for: Increased renal elimination of endogenous and synthetic pyrimidine nucleosides in concentrative nucleoside transporter 1 deficient mice
Source: PubMed Central journal article supplement (PMC10235067; doi:10.1038/s41467-023-38789-8), 2023-06-01
Supplement: 41467_2023_38789_MOESM1_ESM.pdf [file 41467_2023_38789_MOESM1_ESM.pdf]

**Increased renal elimination of endogenous  
and synthetic pyrimidine nucleosides in  
concentrative nucleoside transporter 1  
deficient mice**

Persaud et al.

**Supplementary  
Information**

Supplementary Figures 1-7

Supplementary Tables 1-5

# Supplementary Figure 1

**A**

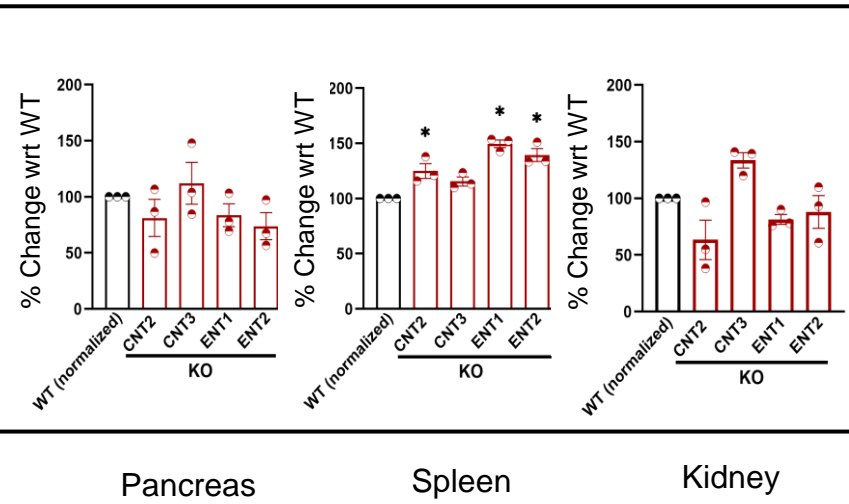

**C**

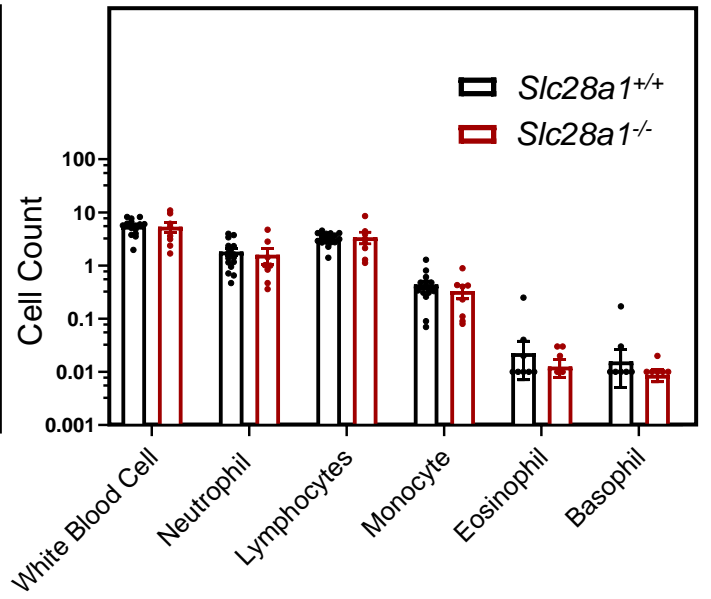

**B**

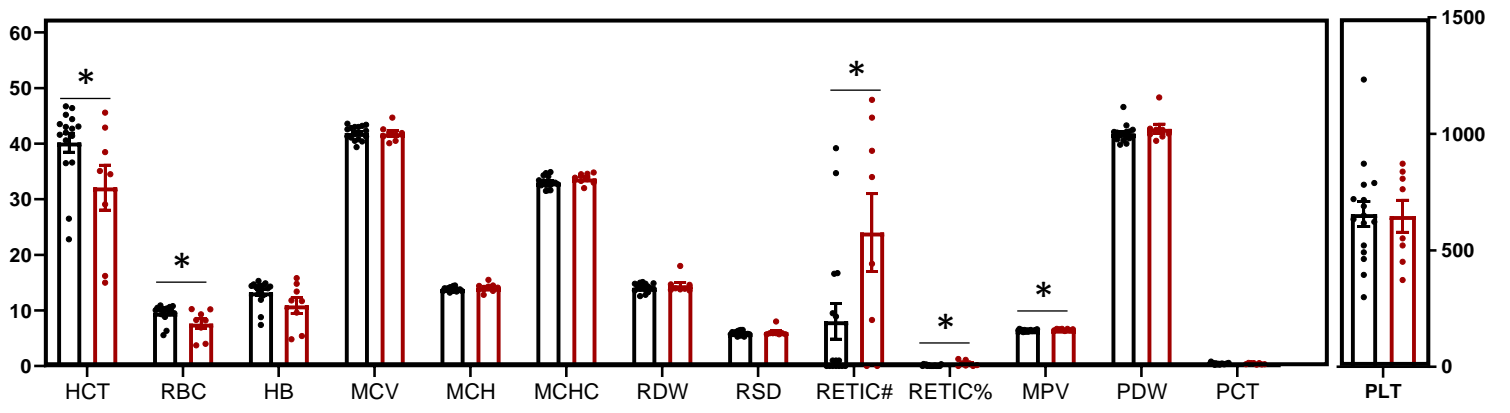

**D**

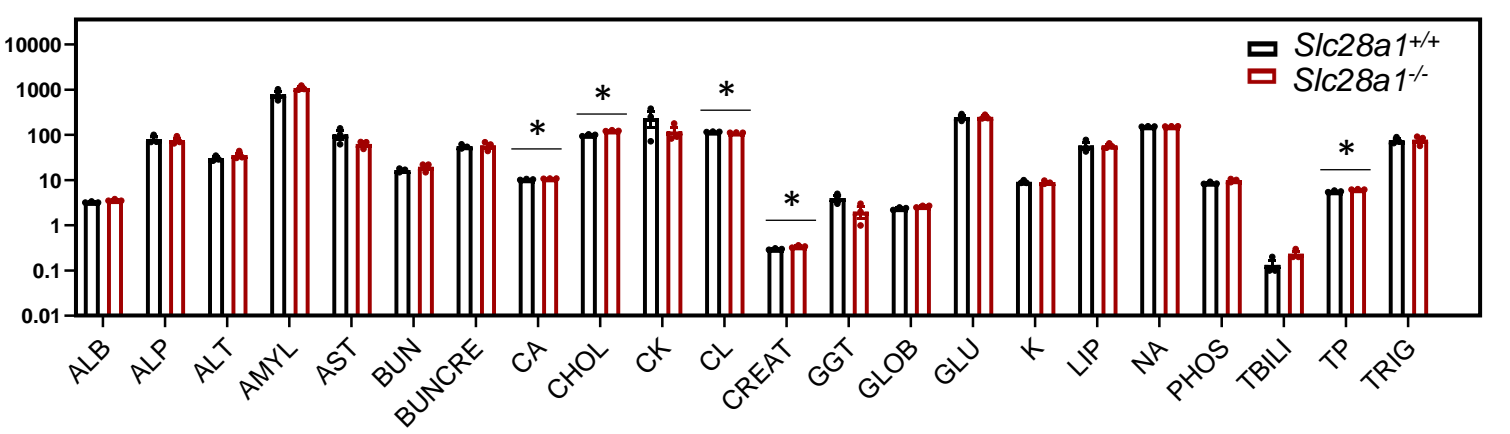

**E**

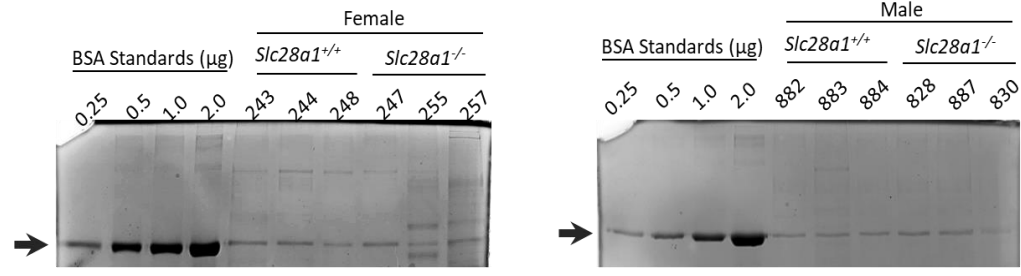

**F**

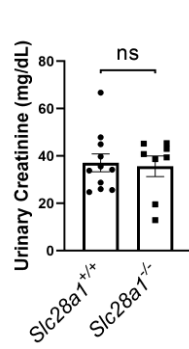

**G**

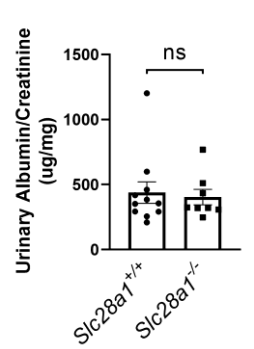

**Supplementary Figure 1. Characterization of CNT1-null mice for blood and urinary parameters.** (A) Relative gene expression in *Slc28a1*<sup>-/-</sup> mouse organs normalized to GAPDH and *Slc28a1*<sup>+/+</sup> control displayed as a percent change (2- $\Delta\Delta$ Ct). Data represent mean  $\pm$  SEM (n=3 mice/group mean  $\pm$  SEM, \*p < 0.05 by two-tailed t-test). (B) Red blood cell and platelet parameters, including HCT (hematocrit; %), RBC (red blood cell count; 10<sup>6</sup>/uL), HB (hemoglobin; g/dL), MCV (mean cell volume; fL), MCH (mean corpuscular hemoglobin; pg), MCHC (mean cell hemoglobin; pg), RDW (red cell distribution width; %), RSD (red cell (erythrocyte) standard deviation), RETIC%# (reticulocyte number; 10<sup>9</sup>/L), RETIC# (reticulocyte %; 10<sup>9</sup>/L), MVP (mean platelet volume; fL), PDW (platelet distribution width; %), PCT (plateletcrit; ug/L), and PLT (platelet count; 10<sup>9</sup>/L) were identified in 12-week-old *Slc28a1*<sup>-/-</sup> (black) and *Slc28a1*<sup>+/+</sup> (red) mice. Data represent mean  $\pm$  SEM (n=13 mice/group mean  $\pm$  SEM, \*p < 0.05 by two-tailed t-test). (C) White blood cell count, including neutrophil, lymphocyte, monocyte, eosinophil, and basophil counts, were identified in 12-week-old *Slc28a1*<sup>-/-</sup> (black) and *Slc28a1*<sup>+/+</sup> (red) mice (n = 13, mean  $\pm$  SEM). Data represent mean  $\pm$  SEM (n=13 mice/group mean  $\pm$  SEM). (D) Clinical chemistry results, including ALB (albumin; g/dL), ALP (alkaline phosphatase; U/L), ALT (alanine transaminase; U/L), AMYL (amylase; U/L), AST (aspartate aminotransferase; U/L), BUN (blood urea nitrogen; mg/dL) BUNCRE (blood urea nitrogen:creatinine), CA (calcium;mg/dL), CHOL (cholesterol; mg/dL), CK (creatinine kinase, U/L), CL (chloride; mmol/L), CREAT (creatinine; umol/L) were identified in 12-week-old *Slc28a1*<sup>-/-</sup> (red) and *Slc28a1*<sup>+/+</sup> (black) mice. Data represent mean  $\pm$  SEM (n=3 mice/group mean  $\pm$  SEM, \*p < 0.05 by two-tailed t-test). (E) Albumin bands (~66 kDa) shown on representative urine samples resolved on a gel. Equal volumes of urine (5  $\mu$ l) were resolved on SDS-PAGE from female and male *Slc28a1*<sup>-/-</sup> and *Slc28a1*<sup>+/+</sup> mice and stained (n=6 mice (3 males and 3 females)/group). BSA (bovine serum albumin) was resolved on the same gel at specified amounts to generate a standard curve to determine albumin concentration from *Slc28a1*<sup>-/-</sup> and *Slc28a1*<sup>+/+</sup> mice (F) Urinary creatinine was measured using the Diazyme creatinine assay and the data represent mean  $\pm$  SEM (n=8 *Slc28a1*<sup>-/-</sup> mice; n=11 *Slc28a1*<sup>+/+</sup> mice/group, \*p < 0.05 by two-tailed t-test) (G) Urinary Albumin/Creatinine ratio was determined and plotted. Data represent mean  $\pm$  SEM (n= n=8 *Slc28a1*<sup>-/-</sup> mice; n=11 *Slc28a1*<sup>+/+</sup> mice/group, \*p < 0.05 by two-tailed t-test)

# Supplementary Figure 2

**A**

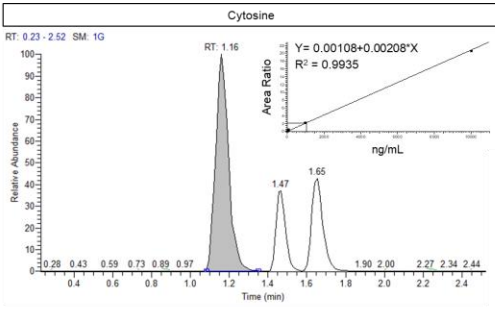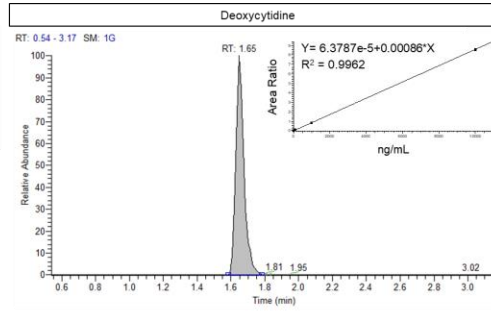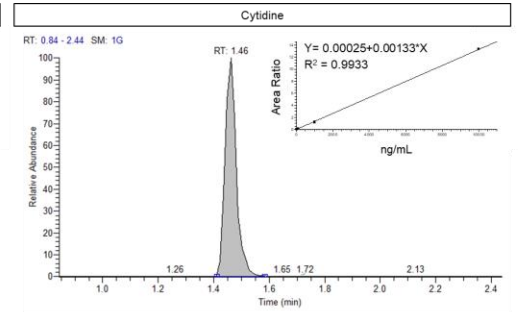

**B**

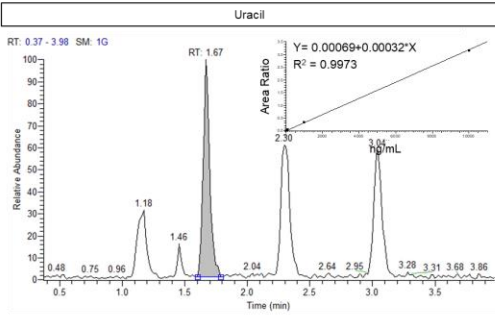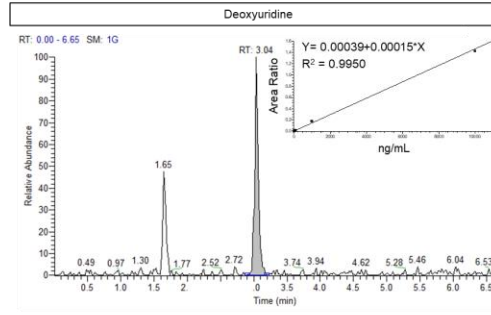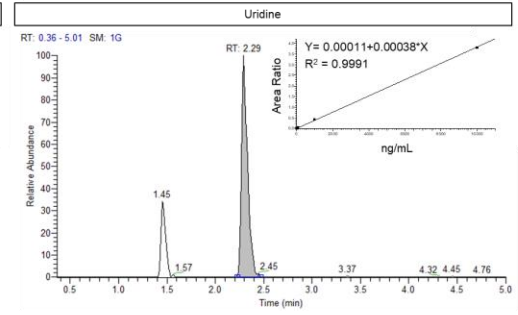

**C**

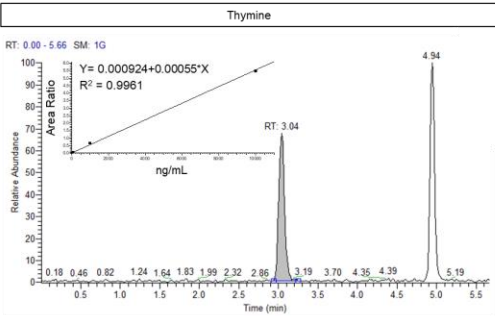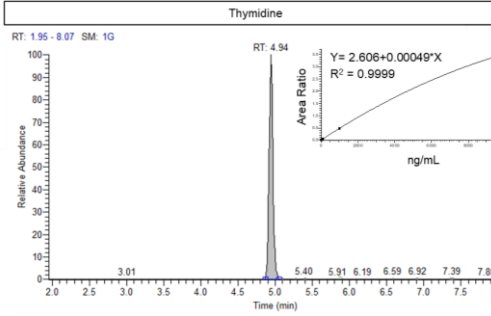

**D**

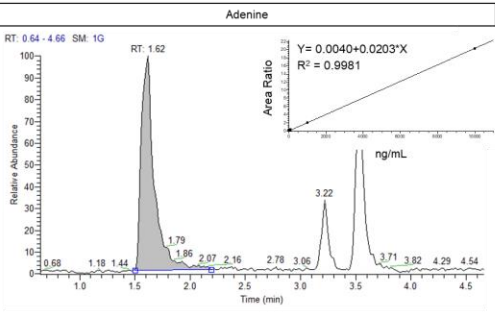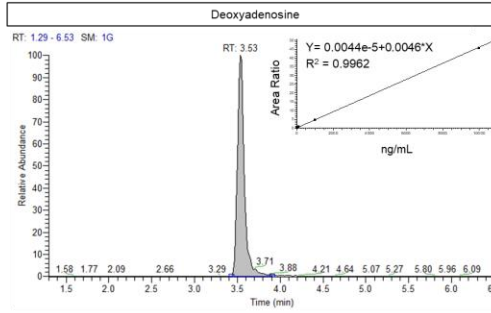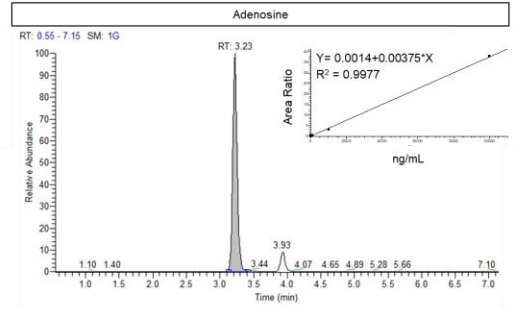

**E**

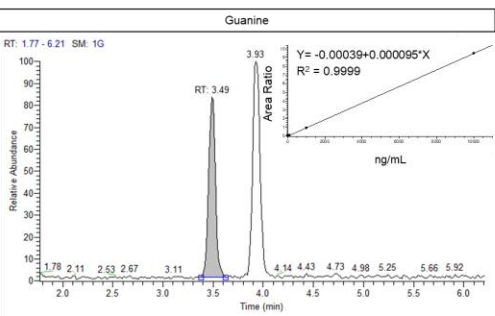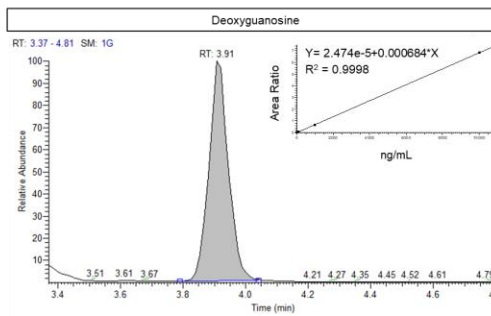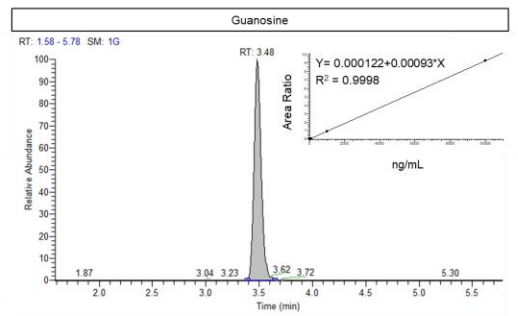

**Supplementary Figure 2: Analyte chromatograms and standard curves from targeted LC-MC/MS analysis of *Slc28a1*<sup>-/-</sup> mice urine. (A) LC chromatographs and standard curves for cytosine and cytosine derivatives. (B) LC chromatographs and standard curves for uracil and uracil derivatives. (C) LC chromatographs and standard curves for thymine and thymine derivatives. (D) LC chromatographs and standard curves for adenine and adenine derivatives. (E) LC chromatographs and standard curves for guanine and guanine derivatives**

# Supplementary Figure 3

**A**

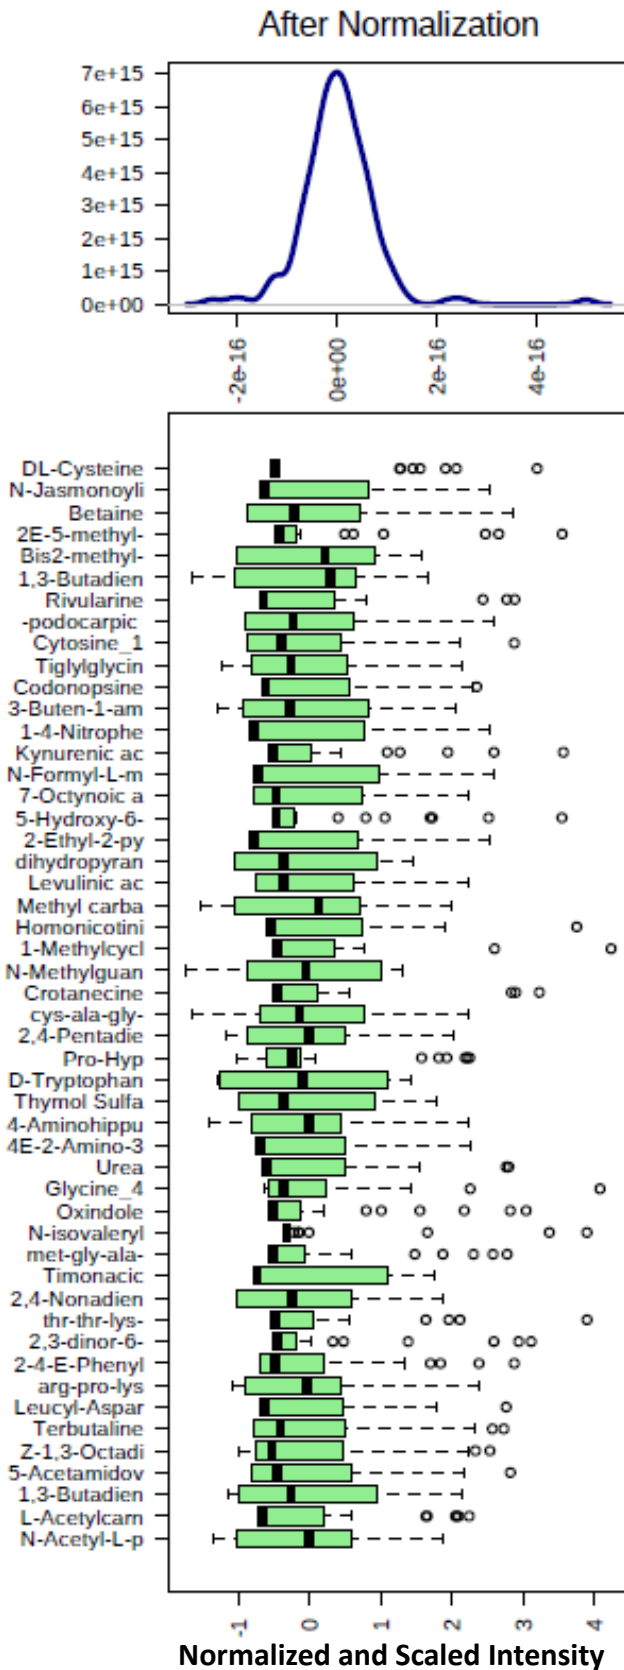

**B**

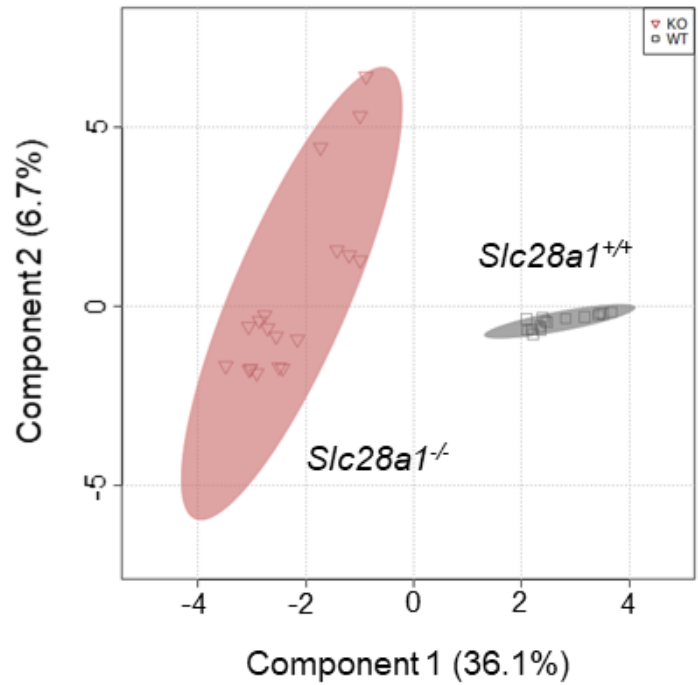

**C**

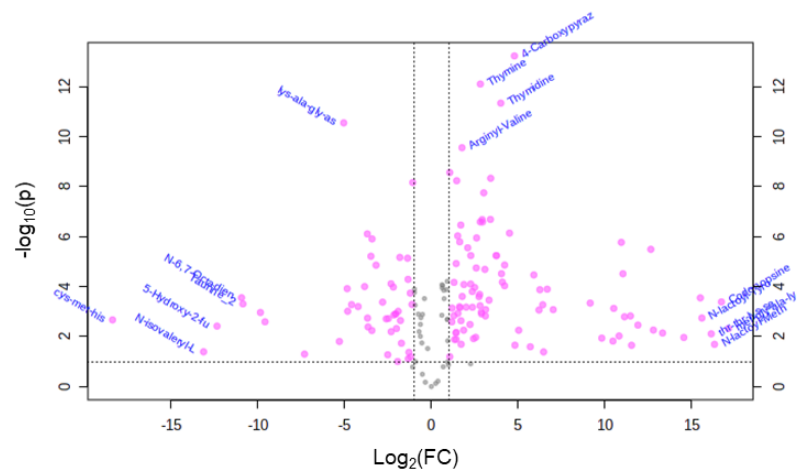

**Supplementary Figure 3. Untargeted metabolomics normalization of *Slc28a1*<sup>-/-</sup> and *Slc28a1*<sup>+/+</sup> mouse urine.** Untargeted metabolomics normalization of *Slc28a1*<sup>-/-</sup> and *Slc28a1*<sup>+/+</sup> mouse urine. **(A)** Box plots and kernel density plots after normalization. The boxplots show median, minima and maxima for at most 50 features due to space limit. The density plots are based on all samples. Selected methods: Row-wise normalization: N/A; Data transformation: N/A; Data scaling: Autoscaling. Analysis of differentially produced metabolites in *Slc28a1*<sup>-/-</sup> urine (n=6). Data are presented as mean values +/- SD. **(B)** Projection to latent structure-discriminant analysis (PLS-DA) score plot constructed based on metabolic profiles of *Slc28a1*<sup>+/+</sup> and *Slc28a1*<sup>-/-</sup> urine samples (black, *Slc28a1*<sup>+/+</sup>; red, *Slc28a1*<sup>-/-</sup>) (n = 6). **(C)** Volcano plots showing metabolite profiles of *Slc28a1*<sup>+/+</sup> compared with *Slc28a1*<sup>-/-</sup> urine samples. Dotted lines along x axis represent  $\pm \log_2(2)$  fold change and dotted line along y axis represents  $-\log_{10}(0.1)$ . p-values derived from two-sided t-test. pink, differential metabolites; grey, other metabolites.

# Supplementary Figure 4

**A**

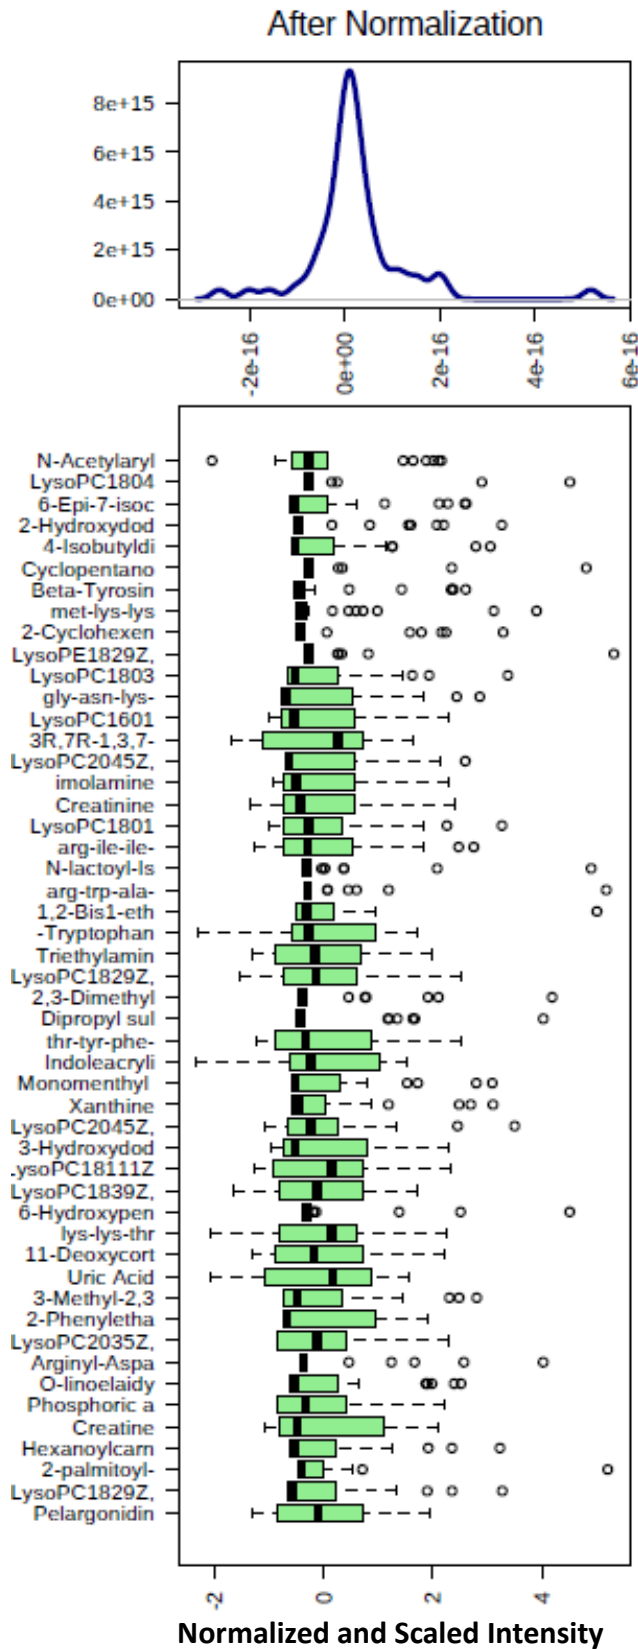

**B**

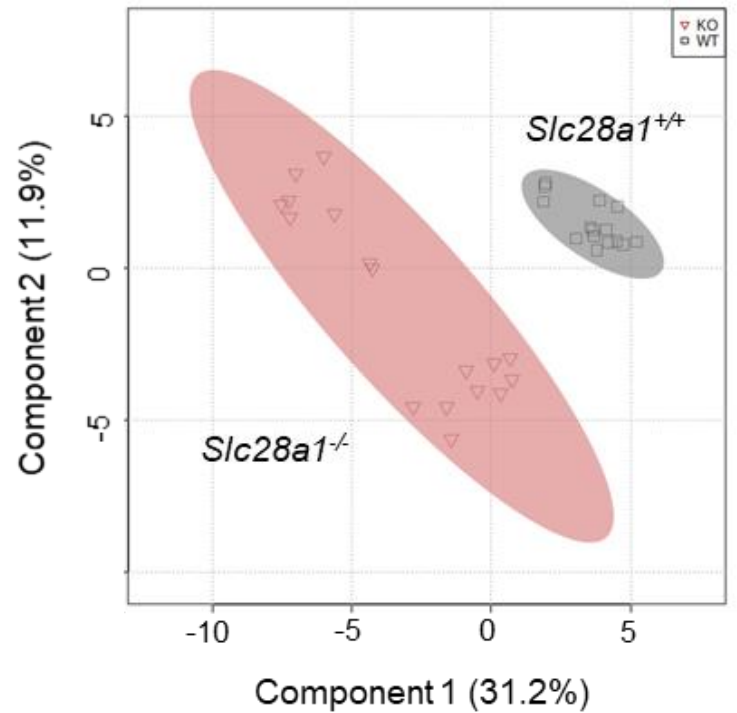

**C**

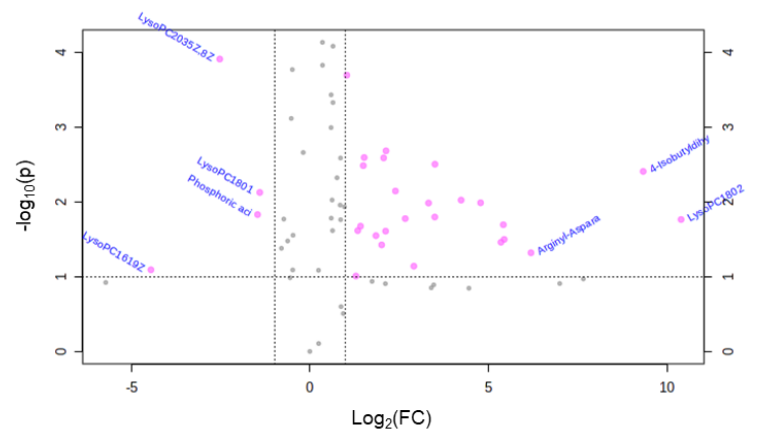



**Supplementary Figure 4. Untargeted metabolomics normalization of *Slc28a1*<sup>-/-</sup> and *Slc28a1*<sup>+/+</sup> mouse plasma.** Box plots and kernel density plots after normalization. **(A)** The boxplots show median, minima and maxima for at most 50 features due to space limit. The density plots are based on all samples. Selected methods: Data scaling: Autoscaling. Analysis of differentially produced metabolites in *Slc28a1*<sup>-/-</sup> plasma (n=6). Data are presented as mean values +/- SD. **(B)** Projection to latent structure-discriminant analysis (PLS-DA) score plot constructed based on metabolic profiles of *Slc28a1*<sup>+/+</sup> and *Slc28a1*<sup>-/-</sup> plasma samples (black, *Slc28a1*<sup>+/+</sup>; red, *Slc28a1*<sup>-/-</sup>) (n =6). **(C)** Volcano plots showing metabolite profiles of *Slc28a1*<sup>+/+</sup> compared with *Slc28a1*<sup>-/-</sup> plasma samples. Dotted lines along x axis represent  $\pm \log_2(2)$  fold change and dotted line along y axis represents  $-\log_{10}(0.1)$ . p-values derived from two-sided t-test. pink, differential metabolites; grey, other metabolites.

# Supplementary Figure 5

**A**

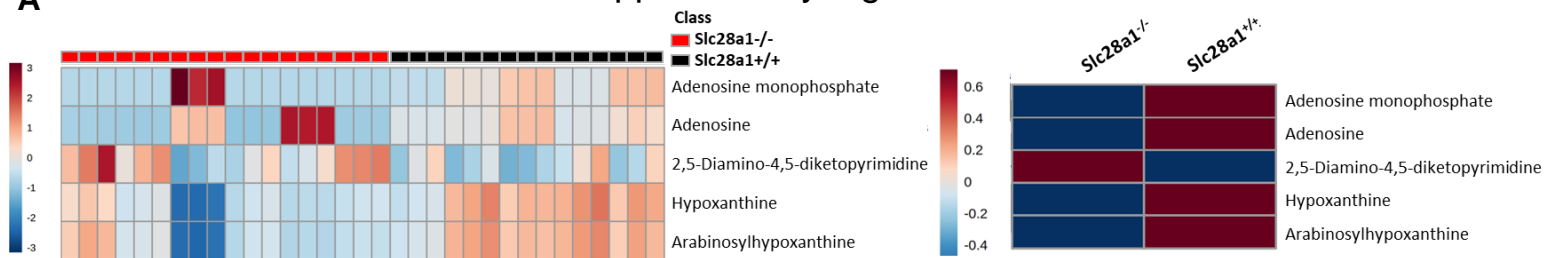

**B**

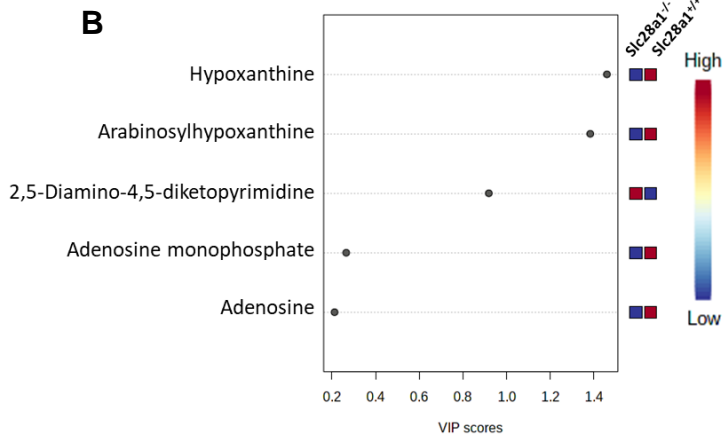

**C**

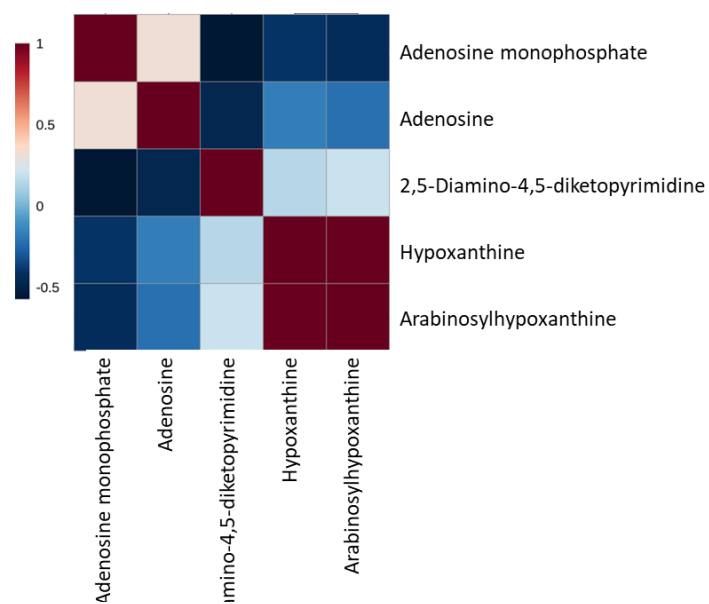

**D**

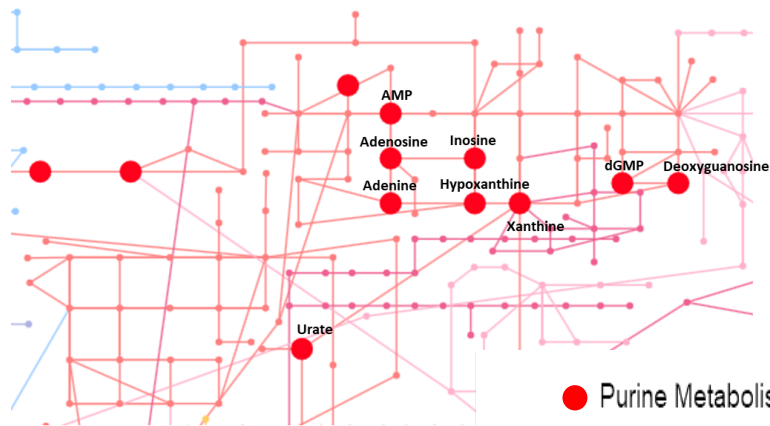

**E**

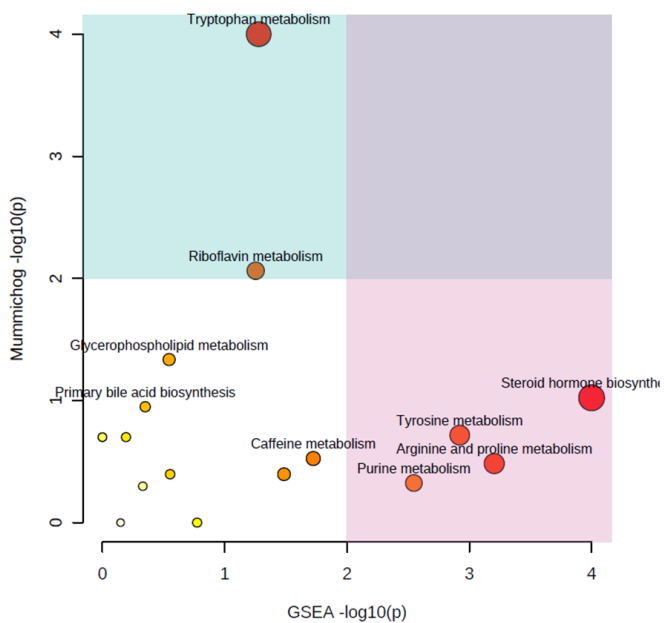

**F**

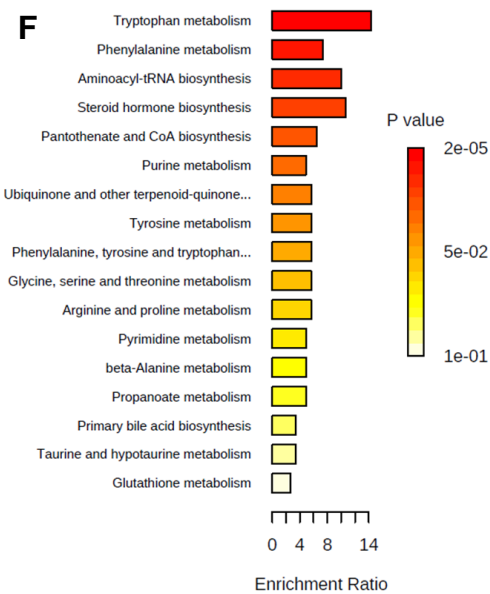

**Supplementary Figure 5.** Untargeted metabolomics analysis and metabolite pathway analysis of *Slc28a1*<sup>-/-</sup> mice plasma. **(A)** Heatmap illustrating hierarchical clustering of differential features (*left*) and the average abundances (*right*) for nucleoside derived metabolites detected across 5 *Slc28a1*<sup>+/+</sup> and 6 *Slc28a1*<sup>-/-</sup> mice plasma samples run in triplicate by mass spectrometry-based metabolomics. Data represent mean ng/ml ± SEM (n=12 mice/group mean ± SEM, \*p < 0.05 (Progenesis ANOVA Scores). MS signal intensities for all heatmaps were clustered in two dimensions based on Euclidean distance (*row*, metabolites; *column*, samples). Colors indicate the metabolite abundances (*red*, high; *blue*, low). For identified metabolites, increased (*red*) or decreased (*blue*) fold change in *Slc28a1*<sup>-/-</sup> and corresponding p-value (*black*) indicated. **(B)** VIP (Variable Importance in Projection) Scores for annotated nucleoside derived features in partial Least Squares-discriminant Analysis (PLS-DA), **(C)** Correlation heatmap illustrating the overall correlation between different features. **(D)** Network visualization of the purine and pyrimidine metabolite networks with altered purine metabolites highlighted red and altered pyrimidine metabolites highlighted in blue for urine metabolomics data using Fisher's method of MS Peaks-to-Paths analysis, **(E)** the Mummichog and GSEA pathway Meta-analysis for MS Peaks to Paths combining the separate algorithms' p-values (\*p < 0.05 by one-tailed hypergeometric test) , and **(F)** Quantitative enrichment analysis using the concentration table of the final annotated list of features for the untargeted differential analysis for *Slc28a1*<sup>-/-</sup> vs *Slc28a1*<sup>-/-</sup> mice urine using the HMDB codes for each feature and the KEGG library (\*p < 0.05 by two-tailed Welch's t test).

# Supplementary Figure 6

**A**

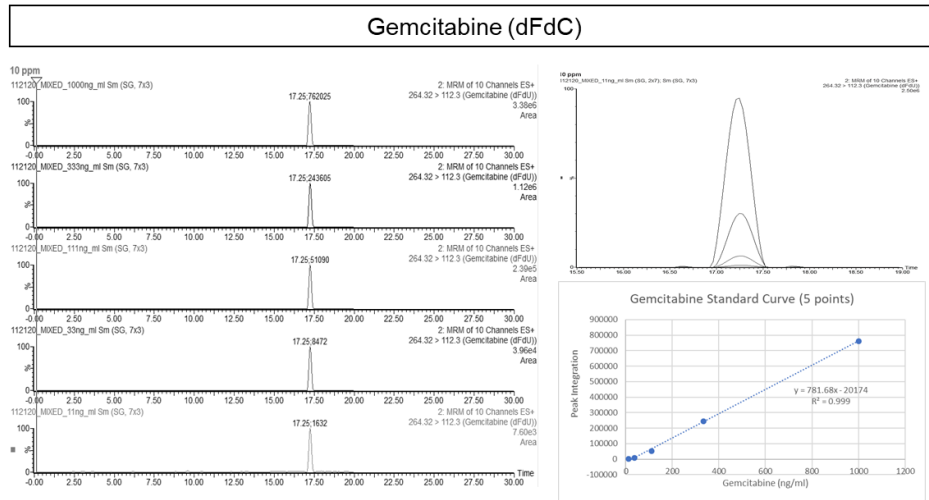

**B**

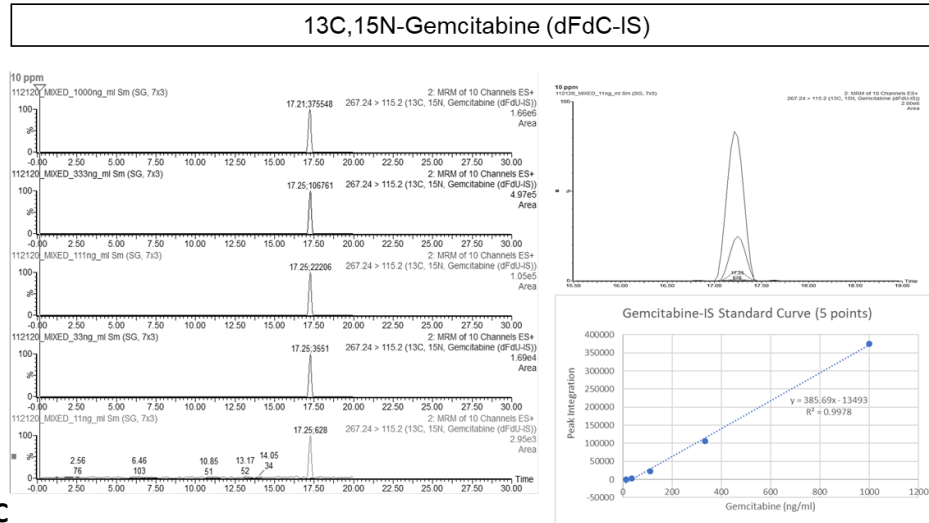

**C**

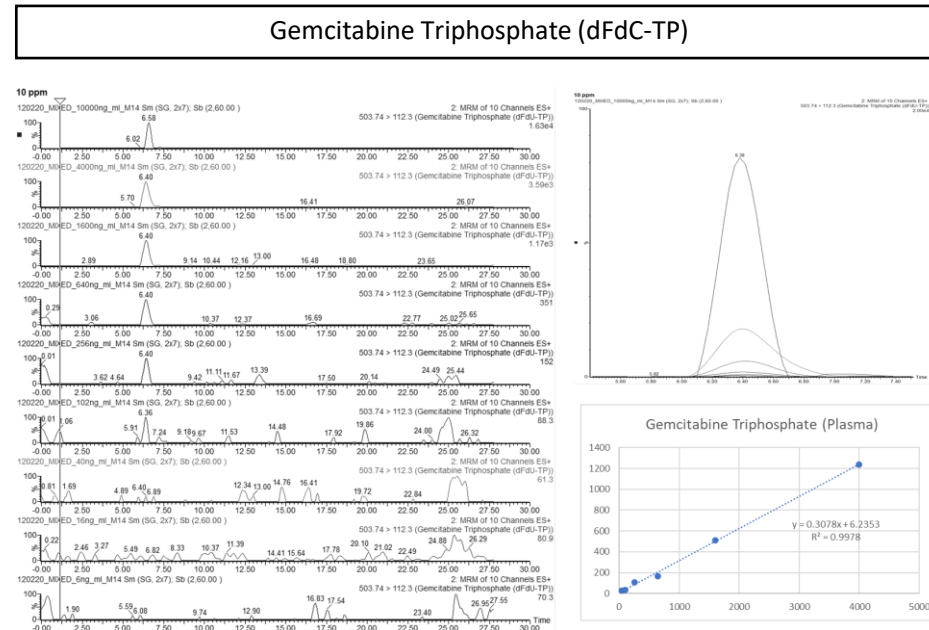

**Supplementary Figure 6: Analyte chromatograms and standard curves for gemcitabine,  $^{13}\text{C}$ ,  $^{15}\text{N}$ -gemcitabine and gemcitabine triphosphate LC-MS/MS analysis of *Slc28a1*<sup>-/-</sup> mouse plasma and urine. (A) LC chromatographs and standard curves for gemcitabine. (B) LC chromatographs and standard curves for  $^{13}\text{C}$ ,  $^{15}\text{N}$ -gemcitabine. (C) LC chromatographs and standard curves for gemcitabine triphosphate.**

# Supplementary Figure 7

**A**

## 2',2'-Difluorodeoxyuridine (dFdU)

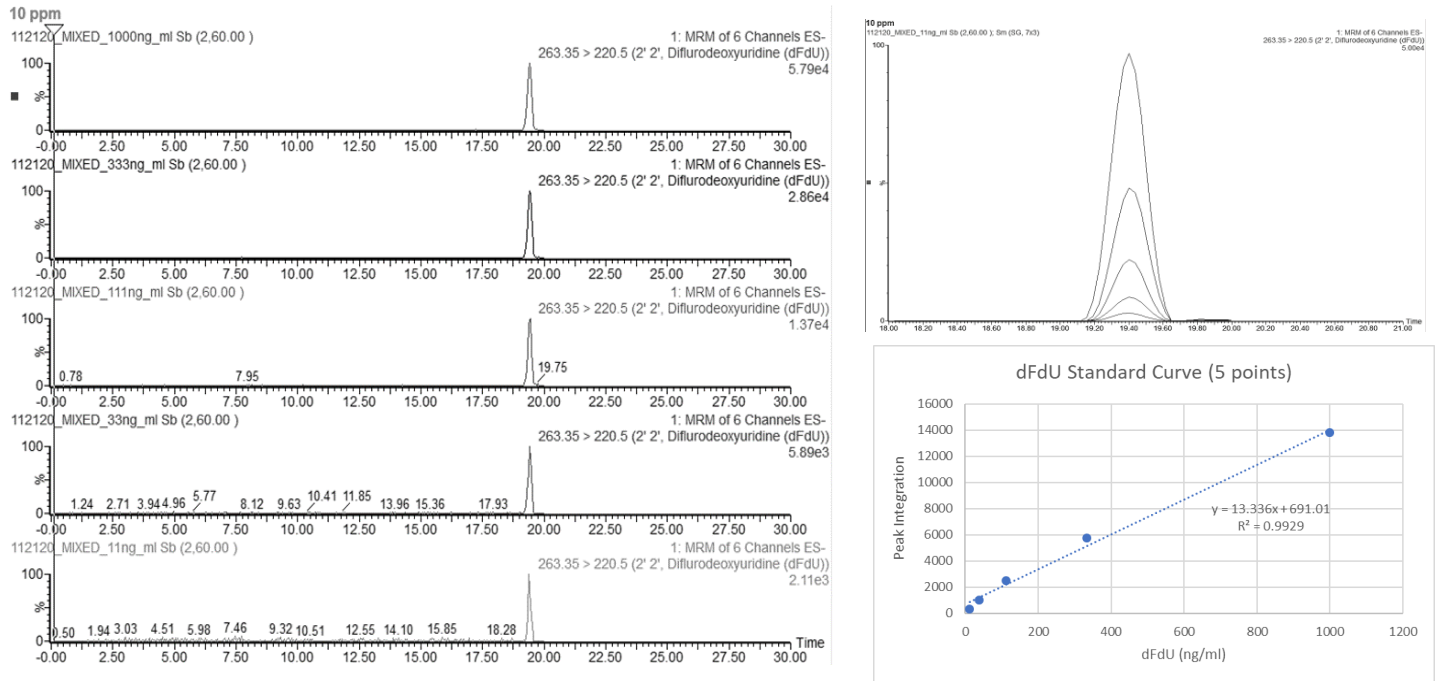

**B**

## 5'-Deoxy-5'-fluorouridine (dFdU-IS/dFUR)

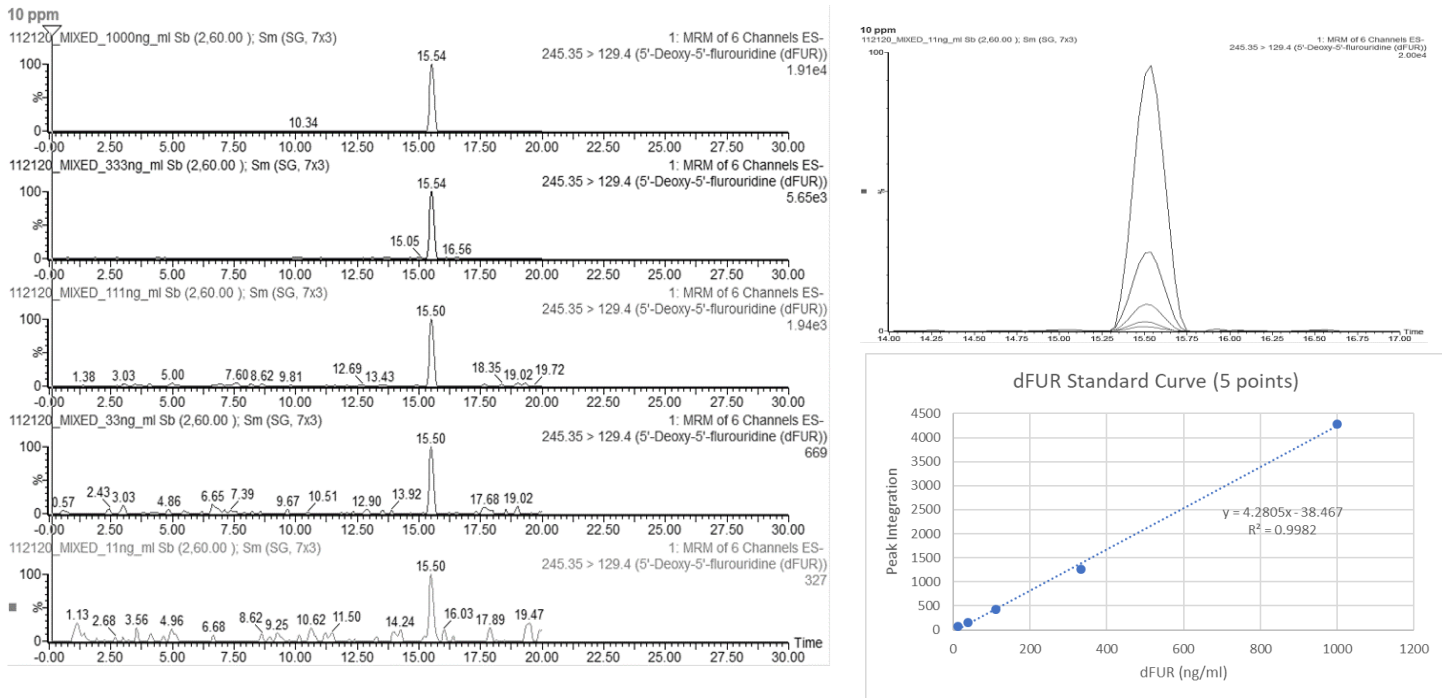

**Supplementary Figure 7: Analyte chromatograms and standard curves for difluorodeoxyuridine (dFdU) and 2',2'-difluorodeoxyuridine LC-MC/MS analysis of *Slc28a1*<sup>-/-</sup> mouse plasma and urine. (A) LC chromatographs and standard curves for 2',2'-difluorodeoxyuridine (dFdU). (B) LC chromatographs and standard curves for 5'-deoxy-5'-fluorouridine (dFdU-IS/dFUR).**

## Supplementary Table 1

| Sequence             | PAM | Score       | Gene               | Chromosome | Strand | Position  | Mismatches | On-target |
|----------------------|-----|-------------|--------------------|------------|--------|-----------|------------|-----------|
| CAGCTGAAGAGCCTAGCACA | TGG | 100         | ENSMUSG00000025726 | chr7       | 1      | 81115537  | 0          | TRUE      |
| AAACTGAAAAGCCTAGCACA | TGG | 1.726466667 |                    | chr12      | -1     | 24845404  | 3          | FALSE     |
| CAACTGAAGTGCCTAGCACC | TGG | 1.609602648 |                    | chr16      | -1     | 44103759  | 3          | FALSE     |
| GAGCTGACGAGCCTAGCAGA | TGG | 1.414893617 |                    | chr18      | 1      | 60631609  | 3          | FALSE     |
| CATCTGCACAGCCTAGCACA | GGG | 1.099569865 |                    | chr5       | 1      | 147629355 | 3          | FALSE     |
| CAGATGGAGATCCTAGCACA | GGG | 1.048360262 |                    | chr4       | -1     | 14813088  | 3          | FALSE     |
| CCACTGTTGAGCCTAGCACA | AAG | 0.99548667  |                    | chr13      | 1      | 34767268  | 4          | FALSE     |
| TAAATGCAGAGCCTAGCACA | CAG | 0.971304808 |                    | chr18      | -1     | 82105271  | 4          | FALSE     |
| CACATGGTGCCTAGCACA   | TAG | 0.963503163 |                    | chr8       | -1     | 51318787  | 4          | FALSE     |
| CAGCAGAAGATCCTAGCACC | TAG | 0.888336364 |                    | chr13      | -1     | 34774121  | 3          | FALSE     |
| CAACCGAAGAGCCTTGCACA | CAG | 0.885487125 |                    | chr13      | 1      | 33355321  | 3          | FALSE     |
| CAACCGAAGAGCCTTGCACA | CAG | 0.885487125 |                    | chr13      | 1      | 33280691  | 3          | FALSE     |
| CTACTGAGGATCCTAGCACA | CGG | 0.882129808 | ENSMUSG00000040433 | chr9       | -1     | 96747360  | 4          | FALSE     |
| CAGCTCAATGGCCTAGCACA | CAG | 0.852252022 |                    | chrX       | -1     | 78584018  | 3          | FALSE     |
| CAGGCTAGGAGCCTAGCACA | GAG | 0.832166988 |                    | chr6       | 1      | 31011924  | 4          | FALSE     |
| CTTCTGAAGTGCCTAGCACT | AAG | 0.827636945 |                    | chr14      | 1      | 71249230  | 4          | FALSE     |
| AAGGGAAGAGGCTAGCACA  | CAG | 0.807718894 |                    | chr11      | 1      | 75595817  | 4          | FALSE     |
| TCGCTGAAGTGTCTAGCACA | GAG | 0.795213177 | ENSMUSG00000036768 | chr9       | 1      | 122988005 | 4          | FALSE     |
| CAGCTGCAGAGCCCAGCACA | TGG | 0.721482463 |                    | chr4       | 1      | 126025882 | 2          | FALSE     |
| AACCTGAAGGCCTAGGACA  | GGG | 0.711728078 | ENSMUSG00000015599 | chr17      | 1      | 46442935  | 4          | FALSE     |
| GGGCAGAAGAGCCTAGCAGA | GAG | 0.65625     |                    | chr1       | 1      | 43061706  | 4          | FALSE     |
| TAGATGAAAAGCCTAGCACA | CAG | 0.64358336  |                    | chrX       | -1     | 139613110 | 4          | FALSE     |
| AGGCTGCAGAGCCTAGCACT | CGG | 0.630210675 |                    | chr4       | -1     | 152449818 | 4          | FALSE     |
| CCGATGAAGAGCCTACCACA | GAG | 0.629672447 | ENSMUSG00000068923 | chr3       | 1      | 88746906  | 3          | FALSE     |
| CAGCTCCACAGCCTAGCACA | AGG | 0.61264533  |                    | chr1       | 1      | 57628904  | 3          | FALSE     |
| CAGCTGCAAAGCCTAGCACC | AGG | 0.608908085 |                    | chr13      | -1     | 34251453  | 3          | FALSE     |
| AAGTTTGAGAGCCTAGCACA | GGG | 0.600848342 |                    | chr15      | -1     | 28691321  | 4          | FALSE     |
| TAGCAACAGAGCCTAGCACA | GGG | 0.595983173 |                    | chr14      | -1     | 66932363  | 4          | FALSE     |
| GAGCTTAGCAGCCTAGCACA | GAG | 0.565191389 |                    | chr4       | -1     | 62258767  | 4          | FALSE     |
| CACCAAGAGAGCCTAGCACA | GGG | 0.560412872 |                    | chr10      | 1      | 70066802  | 4          | FALSE     |
| CAGGAGAGAGCCTAGCACA  | AGG | 0.555501297 |                    | chr1       | 1      | 38185290  | 4          | FALSE     |
| CATGTGCAGAGGCTAGCACA | CAG | 0.524608202 |                    | chr17      | 1      | 24919308  | 4          | FALSE     |
| CAGTTGAAGAGCATAGAACA | AGG | 0.521345304 | ENSMUSG00000092473 | chr7       | -1     | 23953311  | 3          | FALSE     |
| CTGCTGAAGAGCATAGCAGA | GAG | 0.51816443  |                    | chr7       | 1      | 134264785 | 3          | FALSE     |
| CAACTGGGGAGGCTAGCACA | CAG | 0.51544474  |                    | chr8       | -1     | 118422678 | 4          | FALSE     |
| CAACTGGCGAGACTAGCACA | GGG | 0.51544474  |                    | chr2       | 1      | 74464646  | 4          | FALSE     |
| GAAGTGAAGAGCCAAGCACA | GAG | 0.51406372  |                    | chr6       | 1      | 137957805 | 3          | FALSE     |
| AGGCTGAGGAGCCTTGCACA | CAG | 0.50515873  |                    | chr17      | -1     | 31434602  | 4          | FALSE     |
| GAGCTTAAGAGCCTAGCTCA | AGG | 0.50403132  |                    | chr15      | -1     | 80779446  | 3          | FALSE     |
| CCGCTGGAGGGGCTAGCACA | TGG | 0.503449826 | ENSMUSG00000049800 | chr11      | -1     | 20650425  | 4          | FALSE     |
| CAGCACAAGAGCCTTGCACA | CAG | 0.500920325 |                    | chr16      | -1     | 5850168   | 3          | FALSE     |
| TAGATGATGAGCCTGGCACA | GAG | 0.494689119 |                    | chr8       | 1      | 104097301 | 4          | FALSE     |
| CTGCTTAAGCACCTAGCACA | GAG | 0.494035319 |                    | chr19      | 1      | 40275506  | 4          | FALSE     |
| TAGCGGAGGAGCCTGGCACA | GAG | 0.489615385 |                    | chr10      | -1     | 41392477  | 4          | FALSE     |
| CAGCCAAGGATCCTAGCACA | TGG | 0.48824426  |                    | chr14      | 1      | 80825040  | 4          | FALSE     |
| ATGATGAAGAGCCTGGCACA | GAG | 0.48464467  |                    | chr2       | -1     | 5140429   | 4          | FALSE     |
| TCGCTGAAGAATCTAGCACA | CAG | 0.483968284 |                    | chr1       | 1      | 57825352  | 4          | FALSE     |
| AAAGTGAAGAGCCTGGCACA | TAG | 0.473057035 |                    | chr4       | -1     | 11673606  | 4          | FALSE     |
| GACCTGAAGATTCTAGCACA | CAG | 0.472491321 |                    | chr14      | 1      | 113695173 | 4          | FALSE     |
| CCAGTGAAGAGCCTTGCACA | GAG | 0.459211463 |                    | chr13      | 1      | 107721060 | 4          | FALSE     |

**Supplementary Table 1.** Off-target effect summary for *Slc28a1* knockout mice generation.

\*Table displays gRNA sequence parameters used for CRISPR/Cas9 genome editing of *Slc28a1*.



## Supplementary Table 2

| Accepted Description                                                | t.stat | p.value | minusLOG10(p) | FDR   | Fold Change | log2(FC) | Frag. Score | Mass Error (ppm) | Isotope Similarity |
|---------------------------------------------------------------------|--------|---------|---------------|-------|-------------|----------|-------------|------------------|--------------------|
| N-Acetyl-S-allylcysteine                                            | -30.8  | 8E-25   | 24.1          | 2E-22 | 3E-02       | -5.1     | 41.6        | 5.0              | 92.6               |
| hydroxyvalerylglycine                                               | -25.5  | 2E-22   | 21.6          | 3E-20 | 1E-01       | -2.8     | 41.6        | 5.2              | 95.6               |
| Glutamylmethionine                                                  | -24.9  | 5E-22   | 21.3          | 4E-20 | 2E-02       | -5.8     | 29.0        | 2.8              | 92.0               |
| 1-hydroxyhexanoylglycine                                            | -23.7  | 2E-21   | 20.7          | 1E-19 | 2E-01       | -2.4     | 42.6        | 4.1              | 93.7               |
| Indole-3-acetic-acid-O-glucuronide                                  | -22.3  | 1E-20   | 19.9          | 5E-19 | 3E-01       | -1.7     | 62.3        | 2.4              | 94.0               |
| 2-Aminoheptanedioic acid                                            | -22.3  | 1E-20   | 19.9          | 5E-19 | 3E-01       | -1.8     | 58.6        | 4.9              | 96.5               |
| Acetylcysteine                                                      | -20.1  | 2E-19   | 18.6          | 7E-18 | 2E-01       | -2.2     | 22.3        | 4.9              | 91.0               |
| 2,4-Pentadienal                                                     | -20.0  | 3E-19   | 18.5          | 7E-18 | 4E-01       | -1.3     | 25.8        | 9.8              | 98.8               |
| Butane-1,1-diamine                                                  | -19.7  | 4E-19   | 18.4          | 9E-18 | 3E-01       | -1.9     | 34.6        | 8.0              | 96.5               |
| Thiazole, 4,5-dihydro-2,4,4-trimethyl-                              | -18.7  | 2E-18   | 17.7          | 4E-17 | 3E-04       | -11.6    | 50.0        | 6.5              | 93.9               |
| (8Z)-3-Hydroxydodec-8-enoylcarnitine                                | 18.6   | 2E-18   | 17.7          | 4E-17 | 4E+00       | 2.2      | 73.2        | 8.9              | 93.7               |
| Tiglylglycine                                                       | -18.5  | 3E-18   | 17.6          | 5E-17 | 4E-01       | -1.4     | 36.7        | 7.3              | 97.8               |
| 2-Aminohippuric acid                                                | -18.3  | 4E-18   | 17.4          | 6E-17 | 5E-01       | -1.1     | 67.0        | 6.7              | 96.9               |
| 2-hydroxyhexanoylglycine                                            | -17.4  | 1E-17   | 16.8          | 2E-16 | 4E-01       | -1.2     | 42.4        | 4.7              | 96.4               |
| 4-hydroxyhexanoylglycine                                            | -17.4  | 2E-17   | 16.8          | 2E-16 | 3E-01       | -1.6     | 33.0        | 5.2              | 96.6               |
| N-Acetyl-S-(3-hydroxypropyl)cysteine                                | -17.3  | 2E-17   | 16.8          | 2E-16 | 4E-01       | -1.5     | 62.2        | 4.0              | 92.0               |
| 3-Hydroxybutyrylcarnitine                                           | -17.1  | 3E-17   | 16.6          | 3E-16 | 2E-02       | -6.0     | 38.7        | 3.0              | 93.3               |
| 5-Acetamidovalerate                                                 | 16.8   | 4E-17   | 16.4          | 5E-16 | 3E+00       | 1.7      | 54.8        | 5.8              | 99.1               |
| N-Acetyl-DL-homocysteine                                            | -16.4  | 8E-17   | 16.1          | 9E-16 | 1E-01       | -2.9     | 41.8        | 6.0              | 94.4               |
| 2-Piperidinone                                                      | 16.3   | 1E-16   | 16.0          | 1E-15 | 3E+00       | 1.5      | 30.8        | 8.6              | 98.1               |
| (Z)-1,3-Octadiene                                                   | -14.6  | 2E-15   | 14.7          | 2E-14 | 3E-01       | -2.0     | 49.2        | 8.0              | 97.9               |
| L-Proline                                                           | -14.6  | 2E-15   | 14.7          | 2E-14 | 6E-01       | -0.7     | 41.5        | 6.8              | 96.6               |
| 5-Decenoylcarnitine                                                 | 14.2   | 4E-15   | 14.4          | 4E-14 | 7E+00       | 2.8      | 73.3        | 6.6              | 94.7               |
| 2-Fluoro-2',3'-dideoxyadenosine                                     | -14.1  | 5E-15   | 14.3          | 4E-14 | 3E-01       | -2.0     | 44.6        | -5.7             | 97.6               |
| 3,8-Dihydroxytetradecanoylcarnitine                                 | 14.0   | 6E-15   | 14.3          | 4E-14 | 2E+02       | 7.6      | 74.6        | 7.8              | 94.0               |
| N-Acetyl-L-phenylalanine                                            | -13.6  | 1E-14   | 13.9          | 1E-13 | 4E-01       | -1.4     | 37.5        | 8.3              | 96.8               |
| L-alpha-Amino-1H-pyrrole-1-hexanoic acid                            | 13.5   | 2E-14   | 13.8          | 1E-13 | 7E+01       | 6.1      | 56.2        | 4.7              | 96.3               |
| Cyclopentanone                                                      | -13.4  | 2E-14   | 13.7          | 1E-13 | 4E-01       | -1.2     | 32.9        | 9.1              | 97.6               |
| 4-Hydroxy-2,6,6-trimethyl-3-oxo-1,4-cyclohexadiene-1-carboxaldehyde | 13.3   | 2E-14   | 13.6          | 2E-13 | 3E+00       | 1.7      | 59.6        | 4.2              | 96.9               |
| 2-Hydroxy-p-mentha-1,8-dien-6-one                                   | 13.3   | 2E-14   | 13.6          | 2E-13 | 3E+00       | 1.7      | 79.9        | 5.5              | 96.2               |
| Styrene                                                             | -13.2  | 3E-14   | 13.5          | 2E-13 | 4E-01       | -1.3     | 60.5        | 7.7              | 95.0               |
| 1-Nitro-7-glutathionyl-8-hydroxy-7,8-dihydronaphthalene             | -12.9  | 5E-14   | 13.3          | 3E-13 | 3E-01       | -1.8     | 66.9        | 3.4              | 92.4               |
| Estriol                                                             | -12.9  | 5E-14   | 13.3          | 3E-13 | 3E-01       | -1.9     | 62.6        | 1.2              | 94.6               |
| Tryptophyl-Asparagine                                               | -12.9  | 5E-14   | 13.3          | 3E-13 | 6E-02       | -4.0     | 56.6        | -1.2             | 93.3               |
| N-[(3S)-2-Oxotetrahydrofuran-3-Yl]butanamide                        | -12.4  | 2E-13   | 12.8          | 9E-13 | 2E-01       | -2.5     | 31.3        | 6.2              | 97.4               |
| (3Z,5E,7E)-Decatrienoylcarnitine                                    | 12.4   | 2E-13   | 12.8          | 9E-13 | 2E+00       | 1.2      | 44.5        | 3.7              | 88.5               |
| Thioproline                                                         | -12.1  | 3E-13   | 12.6          | 1E-12 | 2E-02       | -5.8     | 25.8        | 7.0              | 95.5               |
| 3-Hydroxytetradecanoyl carnitine                                    | 12.1   | 3E-13   | 12.5          | 2E-12 | 3E+01       | 4.8      | 78.5        | 8.5              | 96.0               |
| Terbutaline                                                         | -11.8  | 5E-13   | 12.3          | 3E-12 | 3E-01       | -1.6     | 31.6        | 6.3              | 96.4               |
| Rivularine                                                          | -11.6  | 9E-13   | 12.0          | 5E-12 | 5E-02       | -4.2     | 34.3        | 6.7              | 96.3               |
| Cyclohexanone                                                       | -11.5  | 1E-12   | 12.0          | 5E-12 | 4E-01       | -1.2     | 41.8        | 8.0              | 98.2               |
| 2,3-Dimethyl-2-cyclohexen-1-one                                     | -11.4  | 1E-12   | 11.9          | 6E-12 | 9E-02       | -3.4     | 59.7        | 6.1              | 95.4               |
| Tetradeca-9,11-dienoylcarnitine                                     | 11.2   | 2E-12   | 11.7          | 8E-12 | 9E+00       | 3.2      | 35.8        | 1.8              | 92.7               |
| Epinephrine glucuronide                                             | -11.2  | 2E-12   | 11.7          | 9E-12 | 2E-04       | -12.3    | 61.8        | 1.7              | 94.8               |
| Prostaglandin F-main urinary metabolite                             | 11.1   | 2E-12   | 11.6          | 1E-11 | 3E+03       | 11.5     | 74.0        | 1.7              | 96.0               |
| 3-(4-Isopropylphenyl)propanal                                       | 10.8   | 5E-12   | 11.3          | 2E-11 | 4E+00       | 2.1      | 47.0        | 4.7              | 91.6               |
| 3-Epinobilin                                                        | 10.7   | 7E-12   | 11.2          | 3E-11 | 4E+02       | 8.8      | 72.3        | 2.2              | 97.4               |
| butenoylcarnitine                                                   | -10.6  | 7E-12   | 11.1          | 3E-11 | 1E-01       | -2.8     | 23.8        | 5.9              | 98.8               |
| Glutamylisoleucine                                                  | 10.5   | 9E-12   | 11.0          | 4E-11 | 4E+00       | 2.1      | 75.5        | 1.5              | 93.8               |
| Adenosine                                                           | 10.1   | 2E-11   | 10.6          | 9E-11 | 2E+00       | 1.0      | 50.3        | 7.8              | 96.5               |

**Supplementary Table 2:** Important features identified by two-sided t-tests from the urine of *Slc28a1* mice, including the fragmentation and metabolite identification information and fold-changes (*Slc28a1*<sup>-/-</sup> / *Slc28a1*<sup>+/+</sup>) \*FDR: False Discovery Rate

## Supplementary Table 3

| Accepted Description                               | t.stat | p.value | minusLOG10(p) | FDR     | Fold Change | log2(FC) | Score | Frag. Score | Mass Error (ppm) | Isotope Similarity |
|----------------------------------------------------|--------|---------|---------------|---------|-------------|----------|-------|-------------|------------------|--------------------|
| L-Tryptophan                                       | 5.0    | 2.0E-05 | 4.7           | 5.6E-04 | 1.2         | 0.3      | 47.8  | 50.3        | 7.4              | 97.0               |
| Hypoxanthine                                       | -4.9   | 3.1E-05 | 4.5           | 5.6E-04 | 0.8         | -0.4     | 45.3  | 36.9        | 7.0              | 97.7               |
| D-Pipecolic acid                                   | -4.9   | 3.1E-05 | 4.5           | 5.6E-04 | 0.5         | -0.9     | 45.5  | 40.0        | 4.9              | 93.4               |
| Indoleacrylic acid                                 | 4.8    | 3.8E-05 | 4.4           | 5.6E-04 | 1.2         | 0.3      | 47.8  | 50.8        | 7.7              | 96.9               |
| 4-Hydroxyquinoline                                 | 4.5    | 9.6E-05 | 4.0           | 1.0E-03 | 1.2         | 0.3      | 50.6  | 61.3        | 4.1              | 96.6               |
| Arabinoxylhydropoxanthine                          | -4.4   | 1.0E-04 | 4.0           | 1.0E-03 | 0.8         | -0.4     | 46.5  | 39.8        | 3.0              | 96.4               |
| Nicotyrine                                         | 4.3    | 1.5E-04 | 3.8           | 1.3E-03 | 1.2         | 0.2      | 53.0  | 72.6        | 3.4              | 96.6               |
| Corticosterone                                     | 3.9    | 4.2E-04 | 3.4           | 3.1E-03 | 1.5         | 0.6      | 54.9  | 82.5        | 2.5              | 94.9               |
| 3a,4,5,6,7,7a-Hexahydroindene-1,2,3-trione         | 3.8    | 5.8E-04 | 3.2           | 3.1E-03 | 2.1         | 1.0      | 42.1  | 21.8        | 2.5              | 91.8               |
| 1,4-Ipomeadiol                                     | 3.8    | 6.2E-04 | 3.2           | 3.1E-03 | 3.7         | 1.9      | 44.4  | 31.1        | 4.6              | 96.5               |
| (E,E)-2,6-Octadienal                               | 3.8    | 6.8E-04 | 3.2           | 3.1E-03 | 3.6         | 1.9      | 45.8  | 39.9        | 5.6              | 95.5               |
| 3-Hydroxytetradecanedioic acid                     | 3.8    | 6.9E-04 | 3.2           | 3.1E-03 | 3.7         | 1.9      | 50.2  | 61.6        | 6.4              | 96.4               |
| 4-Heptenoic acid                                   | 3.8    | 7.0E-04 | 3.2           | 3.1E-03 | 3.8         | 1.9      | 46.4  | 42.6        | 5.8              | 95.8               |
| Methylenecyclohexane                               | 3.7    | 7.3E-04 | 3.1           | 3.1E-03 | 4.3         | 2.1      | 42.8  | 27.2        | 6.0              | 93.7               |
| 3-[(2-Mercapto-1-methylpropyl)thio]-2-butanol      | -3.6   | 1.0E-03 | 3.0           | 3.9E-03 | 0.6         | -0.6     | 46.3  | 46.7        | -1.0             | 85.8               |
| 6-Hydroxypentadecanedioic acid                     | 3.5    | 1.4E-03 | 2.9           | 5.0E-03 | 3.8         | 1.9      | 49.7  | 58.1        | 2.8              | 93.9               |
| Hippuric acid                                      | -3.5   | 1.4E-03 | 2.8           | 5.0E-03 | 0.6         | -0.8     | 43.6  | 29.0        | 3.8              | 93.4               |
| 3-Cyclopentylpropionic acid                        | 3.3    | 2.2E-03 | 2.7           | 7.3E-03 | 3.2         | 1.7      | 47.8  | 41.7        | 1.3              | 98.8               |
| 2-Methylindole                                     | 3.2    | 2.9E-03 | 2.5           | 8.7E-03 | 1.2         | 0.2      | 51.5  | 64.8        | 3.9              | 97.3               |
| xi-7-Hydroxyhexadecanedioic acid                   | 3.2    | 2.9E-03 | 2.5           | 8.7E-03 | 4.0         | 2.0      | 48.9  | 54.1        | 2.2              | 93.2               |
| Pantothenic acid                                   | 3.2    | 3.1E-03 | 2.5           | 8.8E-03 | 1.5         | 0.6      | 52.4  | 70.5        | 4.1              | 96.2               |
| 6-Hydrazinonicotinic acid                          | -3.2   | 3.4E-03 | 2.5           | 9.0E-03 | 0.6         | -0.8     | 49.0  | 59.8        | -9.3             | 95.5               |
| (3S,5R,6R,7E)-3,5,6-Trihydroxy-7-megastigmen-9-one | 3.1    | 3.8E-03 | 2.4           | 9.9E-03 | 1.7         | 0.8      | 52.5  | 69.5        | 3.3              | 96.7               |
| Creatinine                                         | -3.1   | 4.2E-03 | 2.4           | 1.0E-02 | 0.6         | -0.7     | 40.1  | 11.2        | 6.5              | 96.7               |
| Imolamine                                          | 3.1    | 4.6E-03 | 2.3           | 1.0E-02 | 1.7         | 0.8      | 45.2  | 31.5        | 0.0              | 94.5               |
| N-Hexadecanoyl-serine                              | -3.0   | 4.7E-03 | 2.3           | 1.0E-02 | 0.8         | -0.3     | 46.4  | 41.2        | 0.7              | 91.6               |
| Octyl gallate                                      | 3.0    | 4.8E-03 | 2.3           | 1.0E-02 | 1.4         | 0.4      | 45.4  | 41.2        | -6.7             | 93.2               |
| Sebacic acid                                       | 3.0    | 4.8E-03 | 2.3           | 1.0E-02 | 1.9         | 0.9      | 46.5  | 42.6        | 2.6              | 93.1               |
| 8-Hydroxy-5,6-octadienoic acid                     | 3.0    | 5.4E-03 | 2.3           | 1.1E-02 | 1.6         | 0.7      | 40.0  | 10.4        | 3.8              | 94.2               |
| Glutamylleucylarginine                             | 3.0    | 5.8E-03 | 2.2           | 1.1E-02 | 1.9         | 0.9      | 47.1  | 49.3        | 8.8              | 96.1               |
| alpha-Campholonic acid                             | 3.0    | 5.9E-03 | 2.2           | 1.1E-02 | 1.9         | 0.9      | 47.1  | 44.2        | 3.7              | 95.9               |
| met-lys-lys                                        | 2.9    | 6.3E-03 | 2.2           | 1.1E-02 | 1.7         | 0.7      | 53.3  | 86.2        | -9.5             | 90.9               |
| N-Eicosapentaenoyl Methionine                      | 2.9    | 6.4E-03 | 2.2           | 1.1E-02 | 1.9         | 0.9      | 45.7  | 50.8        | 8.1              | 86.6               |
| (2R,3S)-3-(6-Amino-9H-purin-9-yl)nonan-2-ol        | 2.9    | 6.6E-03 | 2.2           | 1.1E-02 | 1.6         | 0.7      | 46.1  | 43.0        | -3.3             | 91.6               |
| 20-Trihydroxy-leukotriene-B4                       | 2.9    | 7.3E-03 | 2.1           | 1.2E-02 | 1.6         | 0.7      | 44.5  | 31.8        | 0.8              | 91.6               |
| Butanedioic acid, octenyl-                         | 2.8    | 7.9E-03 | 2.1           | 1.3E-02 | 1.6         | 0.6      | 46.8  | 43.8        | 5.7              | 96.7               |
| Dynorphin B (10-13)                                | 2.8    | 8.1E-03 | 2.1           | 1.3E-02 | 1.5         | 0.6      | 43.5  | 33.5        | -3.3             | 88.1               |
| 3-Hydroxydodecanedioic acid                        | 2.8    | 8.5E-03 | 2.1           | 1.3E-02 | 1.5         | 0.6      | 48.2  | 51.5        | 6.1              | 96.5               |
| 1-Benzazepine                                      | 2.8    | 8.6E-03 | 2.1           | 1.3E-02 | 1.2         | 0.2      | 51.8  | 66.5        | 1.9              | 94.8               |
| 9,13-Dihydroxy-4-megastigmen-3-one 9-glucoside     | 2.8    | 8.7E-03 | 2.1           | 1.3E-02 | 1.6         | 0.7      | 53.0  | 75.0        | 3.1              | 93.5               |
| asn-gly-lys-gly                                    | 2.6    | 1.3E-02 | 1.9           | 1.8E-02 | 1.6         | 0.7      | 47.5  | 54.2        | 7.9              | 92.3               |
| L-Tyrosine                                         | 2.6    | 1.4E-02 | 1.9           | 2.0E-02 | 1.3         | 0.3      | 53.1  | 73.5        | 4.8              | 97.3               |
| Creatine                                           | -2.6   | 1.5E-02 | 1.8           | 2.0E-02 | 0.7         | -0.5     | 44.3  | 33.7        | 8.9              | 97.7               |
| Isocrotonic acid                                   | 2.6    | 1.5E-02 | 1.8           | 2.0E-02 | 1.5         | 0.6      | 40.5  | 13.8        | 7.8              | 97.2               |
| 13-Docosamide                                      | 2.6    | 1.6E-02 | 1.8           | 2.0E-02 | 1.6         | 0.6      | 51.4  | 63.9        | 0.9              | 94.5               |
| 2,5-Diamino-4,5-diketopyrimidine                   | 2.5    | 1.6E-02 | 1.8           | 2.1E-02 | 1.2         | 0.3      | 47.9  | 42.4        | -1.5             | 99.1               |
| 8-Amino-octanoic acid                              | -2.5   | 1.8E-02 | 1.7           | 2.2E-02 | 0.6         | -0.7     | 48.1  | 50.0        | 6.2              | 97.5               |
| N-Eicosapentaenoyl Cysteine                        | 2.5    | 1.8E-02 | 1.7           | 2.2E-02 | 1.5         | 0.6      | 42.5  | 35.6        | 7.0              | 84.6               |
| (3R,7R)-1,3,7-Octanetriol                          | 2.4    | 2.1E-02 | 1.7           | 2.6E-02 | 1.2         | 0.2      | 42.3  | 20.1        | 5.3              | 97.6               |
| 2-Ethyl-3,4-dihydroxyfuran                         | 2.3    | 2.6E-02 | 1.6           | 3.0E-02 | 1.3         | 0.4      | 43.9  | 37.5        | -5.2             | 88.0               |
| LysoPC(18:3(6Z,9Z,12Z)/0:0)                        | -2.3   | 2.9E-02 | 1.5           | 3.3E-02 | 0.8         | -0.2     | 52.6  | 79.9        | -2.6             | 86.3               |
| Propionylcarnitine                                 | -2.1   | 4.7E-02 | 1.3           | 5.3E-02 | 0.8         | -0.4     | 46.8  | 43.1        | 4.8              | 96.6               |
| Hexanoylcarnitine                                  | -1.9   | 6.5E-02 | 1.2           | 7.0E-02 | 0.7         | -0.5     | 45.5  | 35.5        | 3.5              | 95.9               |
| Oxidized glutathione                               | -1.7   | 1.1E-01 | 1.0           | 1.1E-01 | 0.7         | -0.6     | 44.9  | 40.3        | 3.0              | 87.6               |
| Pentadeca-5,7,9-trienediyolcarnitine               | -1.4   | 1.6E-01 | 0.8           | 1.7E-01 | 0.8         | -0.3     | 42.1  | 26.6        | 9.3              | 94.0               |
| Adenosine monophosphate                            | -0.7   | 5.1E-01 | 0.3           | 5.2E-01 | 0.7         | -0.5     | 46.4  | 39.7        | 1.6              | 94.4               |
| Adenosine                                          | -0.5   | 6.0E-01 | 0.2           | 6.0E-01 | 0.9         | -0.2     | 49.3  | 54.6        | 4.2              | 96.6               |

**Supplementary Table 3.** Important features identified by two-sided t-tests from the plasma of *Slc28a1* mice, including the fragmentation and metabolite identification information and fold-changes (*Slc28a1*<sup>-/-</sup> / *Slc28a1*<sup>+/+</sup>) \*FDR: False Discovery Rate

Supplementary Table 4

Urine

Table 3: Meta-Analysis of Mummichog and GSEA Results

|                                                     | TotalSize | Hits  | Sig_Hits | Mummichog_Pvals | GSEA_Pvals | Combined_Pvals |
|-----------------------------------------------------|-----------|-------|----------|-----------------|------------|----------------|
| Arginine and proline metabolism                     | 37.00     | 18.00 | 17.00    | 0.13            | 0.03       | 0.03           |
| Citrate cycle (TCA cycle)                           | 16.00     | 6.00  | 6.00     | 0.30            | 0.02       | 0.03           |
| Valine, leucine and isoleucine biosynthesis         | 8.00      | 8.00  | 8.00     | 0.20            | 0.06       | 0.07           |
| Pyrimidine metabolism                               | 39.00     | 12.00 | 11.00    | 0.33            | 0.04       | 0.07           |
| Aminoacyl-tRNA biosynthesis                         | 22.00     | 15.00 | 14.00    | 0.21            | 0.07       | 0.08           |
| Steroid hormone biosynthesis                        | 77.00     | 54.00 | 49.00    | 0.05            | 0.33       | 0.08           |
| Metabolism of xenobiotics by cytochrome P450        | 64.00     | 18.00 | 10.00    | 1.00            | 0.02       | 0.09           |
| Purine metabolism                                   | 66.00     | 21.00 | 13.00    | 0.99            | 0.02       | 0.11           |
| Glutathione metabolism                              | 19.00     | 6.00  | 5.00     | 0.71            | 0.07       | 0.20           |
| Terpenoid backbone biosynthesis                     | 15.00     | 1.00  | 1.00     | 0.82            | 0.09       | 0.26           |
| D-Glutamine and D-glutamate metabolism              | 6.00      | 6.00  | 6.00     | 0.30            | 0.26       | 0.28           |
| Retinol metabolism                                  | 15.00     | 8.00  | 5.00     | 0.96            | 0.10       | 0.33           |
| Pantothenate and CoA biosynthesis                   | 17.00     | 7.00  | 7.00     | 0.25            | 0.41       | 0.33           |
| Alanine, aspartate and glutamate metabolism         | 28.00     | 9.00  | 9.00     | 0.16            | 0.67       | 0.35           |
| Porphyrin and chlorophyll metabolism                | 27.00     | 8.00  | 7.00     | 0.56            | 0.21       | 0.37           |
| Arachidonic acid metabolism                         | 35.00     | 34.00 | 17.00    | 1.00            | 0.13       | 0.39           |
| Tyrosine metabolism                                 | 42.00     | 29.00 | 25.00    | 0.38            | 0.35       | 0.40           |
| Phenylalanine metabolism                            | 12.00     | 9.00  | 9.00     | 0.16            | 0.88       | 0.42           |
| Valine, leucine and isoleucine degradation          | 35.00     | 13.00 | 12.00    | 0.29            | 0.58       | 0.47           |
| Butanoate metabolism                                | 15.00     | 8.00  | 6.00     | 0.84            | 0.22       | 0.50           |
| Glycine, serine and threonine metabolism            | 31.00     | 11.00 | 9.00     | 0.69            | 0.28       | 0.51           |
| Lysine degradation                                  | 19.00     | 5.00  | 5.00     | 0.37            | 0.52       | 0.51           |
| Phenylalanine, tyrosine and tryptophan biosynthesis | 4.00      | 3.00  | 3.00     | 0.55            | 0.40       | 0.55           |
| Ascorbate and aldarate metabolism                   | 10.00     | 1.00  | 1.00     | 0.82            | 0.30       | 0.60           |
| Thiamine metabolism                                 | 5.00      | 1.00  | 1.00     | 0.82            | 0.32       | 0.62           |
| Vitamin B6 metabolism                               | 9.00      | 4.00  | 4.00     | 0.45            | 0.62       | 0.64           |
| Fatty acid biosynthesis                             | 10.00     | 1.00  | 1.00     | 0.82            | 0.35       | 0.64           |
| Nitrogen metabolism                                 | 6.00      | 2.00  | 2.00     | 0.67            | 0.43       | 0.65           |
| One carbon pool by folate                           | 9.00      | 6.00  | 5.00     | 0.71            | 0.43       | 0.66           |
| Histidine metabolism                                | 16.00     | 6.00  | 5.00     | 0.71            | 0.43       | 0.67           |
| Arginine biosynthesis                               | 14.00     | 4.00  | 4.00     | 0.45            | 0.74       | 0.70           |
| Ubiquinone and other terpenoid-quinone biosynthesis | 9.00      | 4.00  | 3.00     | 0.85            | 0.40       | 0.70           |
| Folate biosynthesis                                 | 24.00     | 10.00 | 6.00     | 0.98            | 0.35       | 0.71           |
| Tryptophan metabolism                               | 41.00     | 20.00 | 16.00    | 0.72            | 0.49       | 0.72           |
| Glycolysis or Gluconeogenesis                       | 23.00     | 1.00  | 1.00     | 0.82            | 0.46       | 0.74           |
| Propanoate metabolism                               | 19.00     | 7.00  | 5.00     | 0.89            | 0.43       | 0.75           |
| alpha-Linolenic acid metabolism                     | 12.00     | 2.00  | 2.00     | 0.67            | 0.61       | 0.78           |
| Nicotinate and nicotinamide metabolism              | 15.00     | 4.00  | 2.00     | 0.98            | 0.46       | 0.81           |
| Glycerophospholipid metabolism                      | 13.00     | 2.00  | 2.00     | 0.67            | 0.67       | 0.81           |
| Biosynthesis of unsaturated fatty acids             | 34.00     | 6.00  | 5.00     | 0.71            | 0.65       | 0.82           |
| Cysteine and methionine metabolism                  | 33.00     | 7.00  | 6.00     | 0.63            | 0.74       | 0.82           |
| Drug metabolism - cytochrome P450                   | 21.00     | 10.00 | 8.00     | 0.74            | 0.65       | 0.84           |
| Glyoxylate and dicarboxylate metabolism             | 31.00     | 7.00  | 6.00     | 0.63            | 0.77       | 0.84           |
| Taurine and hypotaurine metabolism                  | 8.00      | 3.00  | 3.00     | 0.55            | 0.90       | 0.84           |
| Synthesis and degradation of ketone bodies          | 5.00      | 2.00  | 1.00     | 0.97            | 0.53       | 0.85           |
| Biotin metabolism                                   | 4.00      | 1.00  | 1.00     | 0.82            | 0.65       | 0.87           |
| Phosphonate and phosphinate metabolism              | 4.00      | 1.00  | 1.00     | 0.82            | 0.65       | 0.87           |
| N-Glycan biosynthesis                               | 38.00     | 2.00  | 1.00     | 0.97            | 0.61       | 0.90           |
| Primary bile acid biosynthesis                      | 46.00     | 7.00  | 6.00     | 0.63            | 0.96       | 0.91           |
| Riboflavin metabolism                               | 4.00      | 1.00  | 1.00     | 0.82            | 0.95       | 0.97           |
| Selenocompound metabolism                           | 16.00     | 1.00  | 1.00     | 0.82            | 0.96       | 0.97           |
| D-Arginine and D-ornithine metabolism               | 4.00      | 1.00  | 1.00     | 0.82            | 0.96       | 0.98           |
| Pyruvate metabolism                                 | 19.00     | 4.00  | 2.00     | 0.98            | 0.81       | 0.98           |
| beta-Alanine metabolism                             | 21.00     | 5.00  | 3.00     | 0.96            | 0.96       | 1.00           |
| Amino sugar and nucleotide sugar metabolism         | 35.00     | 4.00  | 2.00     | 0.98            | 0.94       | 1.00           |

**Supplementary Table 4.** Mummichog and GSEA pathway analysis results table from *Slc28a1*<sup>-/-</sup> urine. Table displays ranked pathways that are enriched in *Slc28a1*<sup>-/-</sup> mice. The table displays matched pathways, the total number of hits per pathway, the raw p-values (\*p < 0.05 by one-tailed hypergeometric test) for each algorithm, and the combined p-values (\*p < 0.05 by two-tailed Welch's t test).

## Supplementary Table 5

### Plasma

Table 3: Meta-Analysis of Mummichog and GSEA Results

|                                          | Total_Size | Hits  | Sig_Hits | Mummichog_Pvals | GSEA_Pvals | Combined_Pvals |
|------------------------------------------|------------|-------|----------|-----------------|------------|----------------|
| Steroid hormone biosynthesis             | 77.00      | 25.00 | 5.00     | 0.39            | 0.01       | 0.04           |
| Tryptophan metabolism                    | 41.00      | 5.00  | 3.00     | 0.03            | 0.22       | 0.04           |
| Arginine and proline metabolism          | 37.00      | 12.00 | 2.00     | 0.62            | 0.03       | 0.10           |
| Tyrosine metabolism                      | 42.00      | 16.00 | 3.00     | 0.51            | 0.04       | 0.11           |
| Riboflavin metabolism                    | 4.00       | 1.00  | 1.00     | 0.16            | 0.23       | 0.16           |
| Purine metabolism                        | 66.00      | 14.00 | 2.00     | 0.71            | 0.06       | 0.18           |
| Caffeine metabolism                      | 12.00      | 5.00  | 1.00     | 0.60            | 0.14       | 0.29           |
| Glycine, serine and threonine metabolism | 31.00      | 6.00  | 1.00     | 0.66            | 0.18       | 0.38           |
| Glycerophospholipid metabolism           | 13.00      | 2.00  | 1.00     | 0.30            | 0.47       | 0.42           |
| Primary bile acid biosynthesis           | 46.00      | 3.00  | 1.00     | 0.42            | 0.57       | 0.58           |
| Phenylalanine metabolism                 | 12.00      | 6.00  | 1.00     | 0.66            | 0.46       | 0.67           |
| Lysine degradation                       | 19.00      | 4.00  | 1.00     | 0.52            | 0.67       | 0.71           |
| Aminoacyl-tRNA biosynthesis              | 22.00      | 14.00 | 1.00     | 0.93            | 0.37       | 0.71           |
| Linoleic acid metabolism                 | 4.00       | 4.00  | 1.00     | 0.52            | 0.81       | 0.78           |
| Porphyrin and chlorophyll metabolism     | 27.00      | 4.00  | 1.00     | 0.52            | 0.81       | 0.78           |
| Pantothenate and CoA biosynthesis        | 17.00      | 7.00  | 1.00     | 0.72            | 0.58       | 0.78           |
| Arachidonic acid metabolism              | 35.00      | 14.00 | 1.00     | 0.93            | 0.70       | 0.93           |

**Supplementary Table 5.** Mummichog and GSEA pathway analysis results table from *Slc28a1*<sup>-/-</sup> plasma. Table displays ranked pathways that are enriched in *Slc28a1*<sup>-/-</sup> mice. The table displays matched pathways, the total number of hits per pathway, the raw p-values (\*p < 0.05 by one-tailed hypergeometric test) for each algorithm, and the combined p-values (\*p < 0.05 by two-tailed Welch's t test).
