# Supplementary material for: Increased renal elimination of endogenous and synthetic pyrimidine nucleosides in concentrative nucleoside transporter 1 deficient mice
Source: PubMed Central journal article supplement (PMC10235067; doi:10.1038/s41467-023-38789-8), 2023-06-01
Supplement: 41467_2023_38789_MOESM2_ESM.pdf [file 41467_2023_38789_MOESM2_ESM.pdf]

## **Description of Additional Supplementary Files**

**Supplementary Data 1.** Untargeted metabolomic profiling of the *Slc28a1*<sup>-/-</sup> mouse urine samples: Top altered metabolites

**Supplementary Data 2.** Untargeted metabolomic profiling of the *Slc28a1*<sup>-/-</sup> mouse plasma samples: Top altered metabolites
